# Supplementary material for: Microstructural, Textural, Sensory Properties and Quality of Wheat–Yam Composite Flour Noodles
Source: MDPI journal article supplement (doi:10.3390/foods8100519), 2019-10-21
Supplement: s1 [file s1]

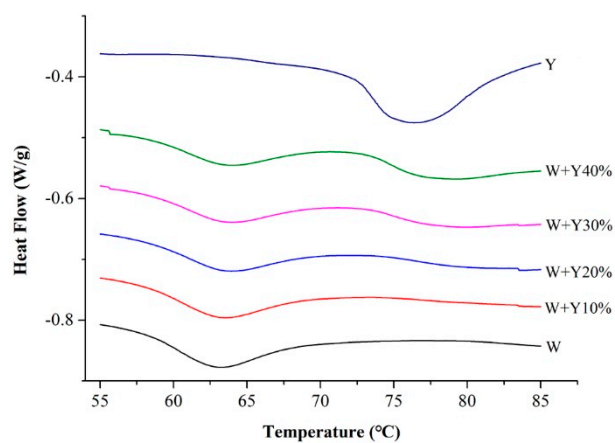

**Figure S1.** Differential scanning calorimetry (DSC) traces of the gelatinization parameters of control wheat flour (W) and yam powder (Y) and wheat flour-yam powder mixtures at 10% to 40%.
